# Hypoxia-Induced Invadopodia Formation Involves Activation of NHE-1 by the p90 Ribosomal S6 Kinase (p90RSK)

Fabrice Lucien, Karine Brochu-Gaudreau, Dominique Arsenault, Kelly Harper, Claire M. Dubois\*

Immunology Division, Department of Pediatrics, Faculty of Medicine and Health Sciences, Université de Sherbrooke, Sherbrooke, Canada

## Abstract

The hypoxic and acidic microenvironments in tumors are strongly associated with malignant progression and metastasis, and have thus become a central issue in tumor physiology and cancer treatment. Despite this, the molecular links between acidic pH- and hypoxia-mediated cell invasion/metastasis remain mostly unresolved. One of the mechanisms that tumor cells use for tissue invasion is the generation of invadopodia, which are actin-rich invasive plasma membrane protrusions that degrade the extracellular matrix. Here, we show that hypoxia stimulates the formation of invadopodia as well as the invasive ability of cancer cells. Inhibition or shRNA-based depletion of the Na<sup>+</sup>/H<sup>+</sup> exchanger NHE-1, along with intracellular pH monitoring by live-cell imaging, revealed that invadopodia formation is associated with alterations in cellular pH homeostasis, an event that involves activation of the Na<sup>+</sup>/H<sup>+</sup> exchange rate by NHE-1. Further characterization indicates that hypoxia triggered the activation of the p90 ribosomal S6 kinase (p90 RSK), which resulted in invadopodia formation and site-specific phosphorylation and activation of NHE-1. This study reveals an unsuspected role of p90RSK in tumor cell invasion and establishes p90RSK as a link between hypoxia and the acidic microenvironment of tumors.

**Citation:** Lucien F, Brochu-Gaudreau K, Arsenault D, Harper K, Dubois CM (2011) Hypoxia-Induced Invadopodia Formation Involves Activation of NHE-1 by the p90 Ribosomal S6 Kinase (p90RSK). PLoS ONE 6(12): e28851. doi:10.1371/journal.pone.0028851

**Editor:** Alana L. Welm, Huntsman Cancer Institute, University of Utah, United States of America

**Received:** July 8, 2011; **Accepted:** November 16, 2011; **Published:** December 27, 2011

**Copyright:** © 2011 Lucien et al. This is an open-access article distributed under the terms of the Creative Commons Attribution License, which permits unrestricted use, distribution, and reproduction in any medium, provided the original author and source are credited.

**Funding:** This work was supported by a grant from the Canadian Institutes for Health Research (grant MOP-89810 to Dr. Dubois). Dr. Dubois is a member of the Fonds de la Recherche en Santé du Québec (FRSQ)-funded Centre de Recherche Clinique Étienne-LeBel. The funders had no role in study design, data collection and analysis, decision to publish, or preparation of the manuscript.

**Competing Interests:** The authors have declared that no competing interests exist.

\* E-mail: Claire.Dubois@usherbrooke.ca

## Introduction

Recent research indicates that important metabolic changes occur within the tumor microenvironment and that these changes correlate with tumor progression and metastasis [1]. Hypoxia has been recognized as an important feature of solid tumors and arises presumably because of an increased metabolic demand associated with defective vascularization [2]. Hypoxia plays a critical role in various cellular events, including cell proliferation and metabolism, as well as tumor invasion and metastasis [3]. In fact, the hypoxic microenvironment of solid tumors selects for survival of aggressive, highly invasive cells that have the propensity to metastasize [4,5]. Hypoxia also triggers an increase in the rate of glycolysis. This increase has been largely attributed to the transcriptional upregulation of the glucose transporters GLUT1 and GLUT4, and enzymes of the glycolytic pathway triggered by the hypoxia-inducible factor HIF-1 [6]. Lactate production during anaerobic glycolysis generates an excess of protons that are extruded by ion transporters and pumps resulting in acidosis of tumor microenvironment [7]. pH measurement in cancer cell lines and within tumors has revealed that the extracellular pH (pH<sub>e</sub>) of malignant tumor microenvironment varies from 6.2 to 6.9, whereas pH<sub>e</sub> in healthy tissues is 7.2 to 7.5 [8,9,10,11]. In contrast, intracellular pH (pH<sub>i</sub>) of cancer cells is more alkaline than in normal cells. Analogous to hypoxia, various studies have shown that alterations in pH<sub>e</sub> and pH<sub>i</sub> modify the phenotype of tumor cells. Acidic conditions, similar to those prevailing in many tumors,

have been shown to increase transcription of VEGF [12], of IL-8 [13,14], and to promote extracellular release/or expression/or activity of key proteases such as cathepsin B and matrix metalloproteinases (MMPs) [15]. Acidosis also amplifies *in vitro* cell invasion and *in vivo* metastasis [14,16,17], events inhibited by the reversal of tumor acidosis by NaHCO<sub>3</sub> administration [18]. Despite the physiological and clinical significance of the relationship between pH- and hypoxia-associated cell invasion and metastasis, this question remains largely unresolved.

Sodium-proton exchangers (NHEs), sodium-dependent and -independent HCO<sub>3</sub><sup>-</sup>/Cl<sup>-</sup> exchangers, H<sup>+</sup>/lactate co-transporters and V-ATPase are mediators of pH homeostasis in healthy as well as cancer cells. Mammalian Na<sup>+</sup>/H<sup>+</sup>-exchangers (NHEs) are members of a family of nine related gene products (NHE1-9). They are integral membrane proteins that share up to 70% amino acid identity. The plasma membrane-type NHEs (NHE1-5) primarily catalyze the electroneutral exchange of one extracellular Na<sup>+</sup> for one cytosolic H<sup>+</sup>. NHE-1 has an ubiquitous tissue distribution, whereas NHE2-5 have a more restricted distribution. Among these exchangers, NHE-1 is considered a main regulator of pH<sub>i</sub> in cancer cells. NHE-1 activity is regulated by pH<sub>i</sub> and oncogenic transformation [19,20]. NHE-1 expression and activity have been shown to enhance the invasive capability of tumor cells through increased release and activity of MMPs and cathepsins [16,17,21], changes in gene expression, and regulation of the actin cytoskeleton [22,23]. NHE-1, in breast cancer cells stimulated with EGF, has also been located at invadopodia protrusion sites where

the exchanger was shown to be involved in acidification of the extracellular microenvironment, resulting in focal ECM degradation [24]. In addition to its well-known N-terminal  $H^+$  sensor and ion translocation function, an increasing number of studies have indicated that the C-terminal cytoplasmic tail of NHE-1 is implicated in the regulation of various cellular processes [25]. For instance, NHE-1 interacts with actin-binding proteins and that results in promotion of cytoskeletal reorganization and cell migration. In addition, phosphorylation of serine residues in the C-terminal domain, by serine/threonine kinases, may increase NHE-1 activity or promote downstream signaling events associated with NHE-1 activation. Several protein kinases have been proposed to regulate NHE-1 activity, including NIK, p90RSK and ROCK1. Among these, p90RSK has been reported to phosphorylate Ser<sup>703</sup> in the C-terminal domain of NHE-1, resulting in an increased rate of  $Na^+/H^+$  exchange in response to serum [26]. Whereas the role of p90RSK in the activation of NHE-1 is beginning to be understood, its implication in cell migration and invasion need to be further evaluated.

Metastatic tumor cells that actively migrate and invade surrounding tissues rely on cell membrane protrusions named invadopodia to degrade the extracellular matrix (ECM) barrier. *In vitro* and *in vivo* studies on breast cancer and melanoma progression have revealed a correlation between invadopodia formation and the potential of cell invasiveness [27,28]. The basic molecular components involved in invadopodia formation and function are getting better defined. Invadopodia formation depends on a series of complex interactions between signal transduction molecules including members of serine/threonine and tyrosine kinase families, various classes of integrins, which provide attachment to the substratum, as well as cytoskeleton components and regulatory proteins such as N-WASP, Arp2/3, Tks5, F-actin and cortactin. Soluble and membrane-bound proteases, mostly metalloproteinases, are enriched at invadopodia sites and that correlates with the invasive potential of cancer cells [29,30]. Invadopodia formation has been shown to be induced by few stimuli, including integrin engagement by ECM components, EGF and LPA [31,32,33]. Therefore, despite intensive research on invadopodia biology, little is known about specific inducers/enhancers during tumor progression.

In the present study, we showed that hypoxia stimulated invadopodia formation and cell invasion in cancer cells. Using the invasive fibrosarcoma cell line HT-1080, we observed that invadopodia formation was also associated with variations in  $pH_i$ , an observation that was related to activation of NHE-1. We also present evidence for a hitherto unsuspected role of p90RSK that is related to its capacity to phosphorylate and activate NHE1 under hypoxic conditions and, consequently, to trigger an increase in invadopodia formation. Our results provide new insights into the relationship between hypoxia and the acidic microenvironment during the metastatic process.

## Results

### Hypoxia increases NHE-1 activity in HT-1080 cells

Cytoplasmic pH ( $pH_i$ ) as well as extracellular pH ( $pH_e$ ) are tightly regulated, in part through  $Na^+/H^+$  exchangers, including NHE-1, which is ubiquitously expressed in eukaryotic cells. A recent report has indicated that exposure of arterial myocytes to chronic hypoxia resulted in an alkaline shift in  $pH_i$  and increased NHE-1 activity [34]. To establish whether short-term hypoxia influenced  $pH_i$  homeostasis and NHE-1 activity in HT-1080 cells, they were exposed to normoxia or hypoxia (1%  $O_2$ ) for 4 h in a bicarbonate-free solution, a condition that prevents contributions

from the  $Cl^-/HCO_3^-$  exchangers [20]. Under these conditions, steady-state  $pH_i$  was significantly increased in HT-1080 cells exposed to 1%  $O_2$  for 4 h ( $7.21 \pm 0.03$ ) as compared to cells cultured under normoxic conditions ( $6.93 \pm 0.06$ ) (Figure 1A). Similar findings were observed for the 8 h time-point (data not shown). Inhibition of NHE-1 by treating the cells with the NHE-1 inhibitor EIPA or by knocking down NHE-1 using shRNA strongly reduced the increase in  $pH_i$  due to hypoxia (Figure 1A). In addition, NHE-1 activity (determined by the  $Na^+/H^+$ -exchange rate ( $dpH_i/dt$ )) was increased 2-fold in HT-1080 cells cultured under hypoxic conditions when compared to cells exposed to normoxia (Figure 1B). The increase in NHE-1 activity was further augmented in cells overexpressing NHE-1 (Figure 1C). In contrast, knocking down NHE-1 fully blocked the hypoxia-mediated increase in  $pH_i$  recovery and  $Na^+/H^+$  exchange rate (Figure 1D), an effect that was reversed by rescue experiments involving reintroduction of NHE-1 into knockdown cells (Figure 1E). We further investigated whether the findings observed in HT-1080 cells applied to other cancer cell lines. Hypoxia increased NHE-1 activity in human breast cancer cell line MDA-MB-231 and mouse B16 melanoma cells (Figure S1A–1B). Taken together, these results indicated that hypoxia altered  $pH_i$  homeostasis in a variety of neoplastic cells, a condition that involved the  $Na^+/H^+$  exchanger NHE-1.

### Hypoxia-induced NHE-1 activity occurs in an HIF-1-independent manner

Chronic exposure of arterial myocytes to hypoxia has been shown to result in an increased in NHE-1 expression and activity, which was proposed to be due to HIF-1-dependent-transcriptional activation of the exchanger [34]. To investigate whether our observations of an upregulation of NHE-1 activity observed after a 4 h exposure to hypoxia could be explained by a HIF-1-dependent increase in NHE-1 expression, we quantified NHE-1 mRNA and protein levels in HT-1080 cells incubated for various periods of time under hypoxic conditions. Although results showed a significant increase in NHE-1 mRNA and protein expression after 16 h exposure to a low oxygen concentration, there were no significant changes after 4 h and 10 h of exposure (Figure 2A–2B), which correspond to times where we observed an increase in NHE-1 activity (Figure 1A–1B and data not shown). These results suggested a lack of involvement of either HIF-1 and/or variations in NHE-1 concentrations in the increase in NHE-1 activity in response to short-term exposure to hypoxia. This interpretation was further supported by experiments demonstrating that the increase in the rate of  $Na^+/H^+$  exchange was not affected in HIF-1 knockdown cells exposed to low oxygen concentrations for 4 h (Figure 2C). Altogether, these data indicated that the observed increase in NHE-1 activity was not due to HIF-1-dependent or -independent modulation of NHE-1 expression.

### NHE-1 is required for hypoxia-induced invadopodia formation and function

To evaluate the functional relevance of the increase in NHE-1 activity under hypoxia, we first examined whether acidic  $pH_e$  influenced the capacity of the cells to degrade the extracellular matrix. HT-1080 cells were seeded onto coverslips coated with fluorescent gelatin in medium at pH 7.4 or 6.6 and the cells were allowed to degrade the gelatin matrix under normoxic or hypoxic conditions for 10 h. Cells were then fixed, stained with Texas Red-phalloidin (actin) and DAPI (nucleus), and the percentage of ECM-degrading cells was determined by fluorescence microscopy. Results showed that the ability of the cells to degrade fluorescent

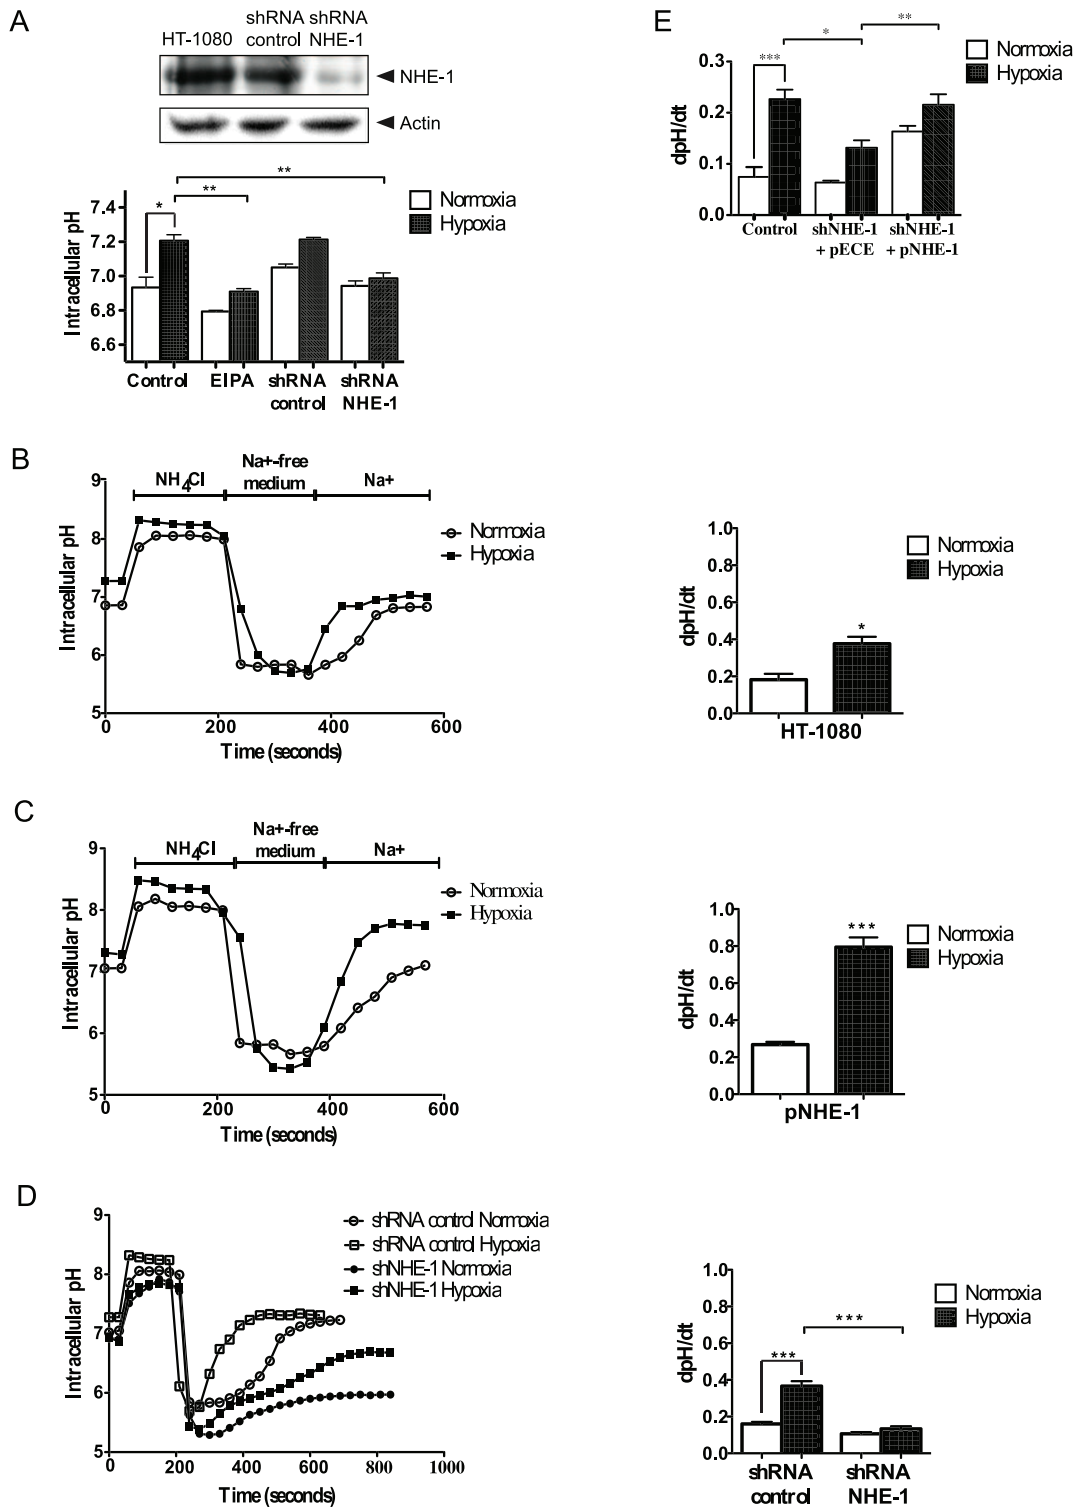

**Figure 1. Hypoxia increases NHE-1 activity in HT-1080 cells.** (A) Control (untransfected) HT-1080 cells incubated in the presence or absence of the NHE-1 inhibitor, EIPA (25  $\mu$ M), or cells transfected with scrambled (control) shRNA, or NHE-1 shRNA, were incubated for 4 h under normoxic or hypoxic conditions. Basal intracellular pH ( $pH_i$ ) was measured using BCECF ( $n=300$  cells). Immunoblot showing knock down of NHE-1 expression in NHE-1 shRNA transfected cells. Actin was used as a loading control. (B–D) Representative traces showing  $pH_i$  recovery after ammonium chloride-prepulse-induced acidification in HT-1080 cells cultured under normoxic or hypoxic conditions with associated bar graph showing  $Na^+/H^+$  exchange rates ( $n=300$  cells per condition), for (B) untransfected cells, (C) cells transfected with pNHE-1, or (D) cells transfected with control shRNA or NHE-1 shRNA. (E) Rescue experiments were performed by transfection of NHE-1 shRNA-transfected cells with pNHE-1.  $Na^+/H^+$  exchange rates were measured in cells exposed to normoxic or hypoxic conditions. Columns represent the mean  $\pm$  SEM indicated by the horizontal bars. The asterisks correspond to, \*  $p<0.01$ ; \*\*  $p<0.001$ ; \*\*\*  $p<0.0001$ . doi:10.1371/journal.pone.0028851.g001

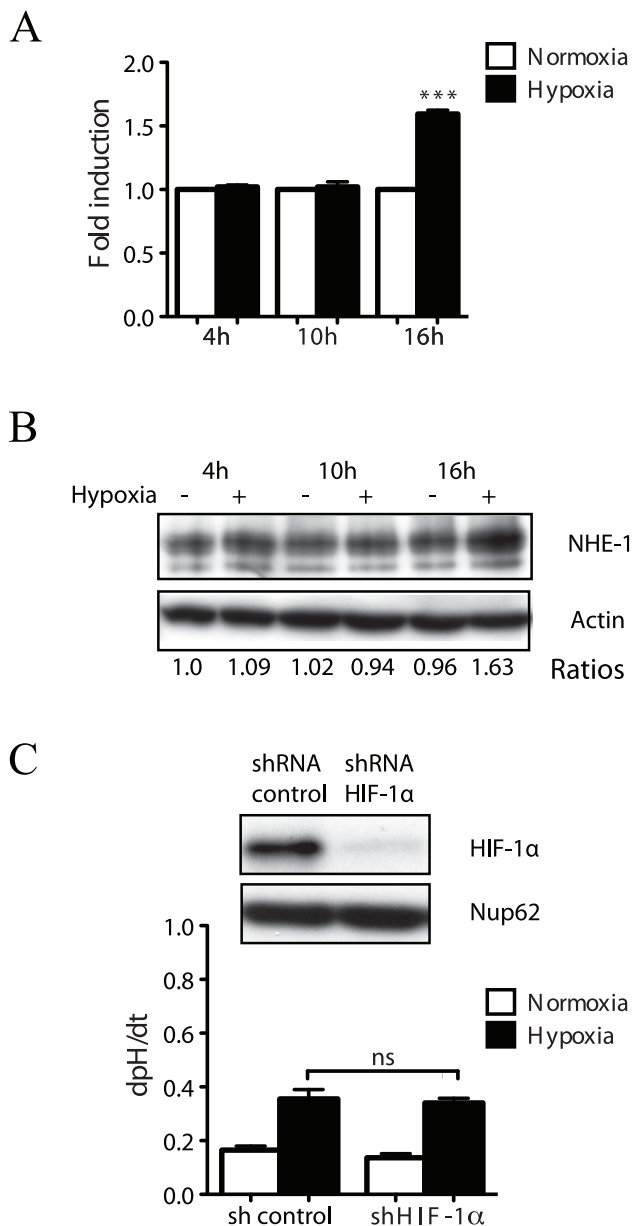

**Figure 2. Hypoxia-induced NHE-1 activity occurs in a HIF-1-independent manner.** HT-1080 cells were exposed to normoxic or hypoxic conditions for the indicated times. (A) NHE-1 mRNA expression measured by RT-PCR ( $n=3$ ). (B) Representative immunoblot showing NHE-1 expression in cell lysates ( $n=3$ ). Actin was used as a loading control. (C)  $\text{Na}^+/\text{H}^+$  exchange rate in HT-1080 cells transfected with HIF-1 $\alpha$  shRNA or control (scrambled) shRNA and exposed to 21%  $\text{O}_2$  or 1%  $\text{O}_2$  for 4 h. Immunoblot showing HIF-1 $\alpha$  knock down in cell lysates. Nup62 was used as a loading control. NS: not significant. Columns represent the mean  $\pm$  SEM indicated by the horizontal bars. The asterisks correspond to, \*\*\*  $p<0.0001$ . doi:10.1371/journal.pone.0028851.g002

gelatin was increased in HT-1080 cells cultured in an acidic medium and that this was further augmented by exposure of the cells to hypoxia (Figure 3A). The presence of actin clusters at the basal plasma membrane that colocalized with areas of ECM degradation indicated that such cell degradation process was induced by invadopodia (Figure 3B). Transient overexpression of NHE-1 significantly increased the percentage of invadopodia producing cells incubated under normoxic or hypoxic conditions

(Figure 3C). In contrast, knockdown of NHE-1 abrogated the capacity of the cells to produce more invadopodia under hypoxic conditions (Figure 3D). Similar results were obtained when NHE-1 activity was inhibited following cell treatment with the NHE-1-selective inhibitors EIPA or zoniporide in HT-1080, MDA-MB-283, and B16 cells (Figures S1C-S1D, S2A). Furthermore, overexpression of NHE-1 induced an increase in the number of invadopodia formed per cell, identified by clusters of actin and cortactin, two *bona fide* markers of invadopodia [35], as well as an increase in the areas of ECM degradation per cell (Figures 3E–3F). In contrast, depletion of NHE-1 by shRNA abolished both hypoxia-induced invadopodia formation and ECM degradation (Figures 3G–3H). Taken together, these results indicated that NHE-1 was required for hypoxia-induced invadopodia formation and function in cancer cells.

### NHE-1 is required for hypoxia-induced cell invasion

We next investigated the contribution of the NHE-1 exchanger to cell invasion using a 3D cell invasion assay. This assay is known to measure both the amoeboid- (protease-independent) and mesenchymal-like (protease-dependent) modes of cell dissemination [36]. Cells transfected with NHE-1 or control shRNA were seeded on top of fibrillar type I collagen gels and allowed to migrate under normoxia and hypoxia for 24 h. Cells were then stained with calcein-AM and cells that had invaded collagen gels were imaged and quantitated at each 5  $\mu\text{m}$  layer within the gel using confocal microscopy. Results showed that knocking down NHE-1 significantly decreased the capacity of the cells to invade deeply into the collagen gels and fully blocked their ability to respond to hypoxia-induced enhanced migration (Figure 4A–4B). Therefore, as in the case of the invadopodia assays, our results indicated that NHE-1 was essential for hypoxia-induced cell invasion through 3D-collagen matrices. They also indicated that, under normoxia, NHE-1 was not involved in invadopodia formation but it was required for cell invasion, possibly due to its role as a plasma membrane anchor for cortical actin filaments at the leading edge of the lamellipodia [37,38], leading to an amoeboid mode of cell migration [39].

### Activation of p90RSK by hypoxia results in NHE-1 activation and invadopodia generation

Data shown above revealed that the increase in NHE-1 activity was not due to a HIF-1-dependent or -independent modulation of NHE-1 expression, suggesting the involvement of post-translational mechanisms. NHE-1 exchange activity can be regulated by phosphorylation of its cytoplasmic tail [25]. Among the kinases known to activate NHE-1, the serine kinase p90RSK has been shown to increase NHE-1 activity by phosphorylation of a key serine<sup>703</sup> residue located in the cytoplasmic tail of the exchanger which serves as a docking site for the 14-3-3 adaptor protein [26]. To investigate whether p90RSK was involved in hypoxia-induced NHE-1 activation, we first examined the state of phosphorylation of p90RSK in HT-1080 cells under hypoxic conditions. Time-course studies revealed that p90RSK phosphorylation was sharply increased 30 min and 45 min following exposure of the cells to hypoxia, as compared to normoxia (Figure 5A). Hypoxia-induced phosphorylation was almost completely blocked by PD98059 suggesting the involvement of the MAPK pathway in p90RSK activation. In a second set of experiments, an antibody directed against the 14-3-3 binding motif was used to reveal the NHE-1 Ser<sup>703</sup> phosphorylation site [40]. The levels of NHE-1 Ser<sup>703</sup> phosphorylation coincided with hypoxic activation of p90RSK, suggesting a role for this kinase in NHE-1 activation (Figure 5A). To further assess the involvement of p90RSK in hypoxia-induced

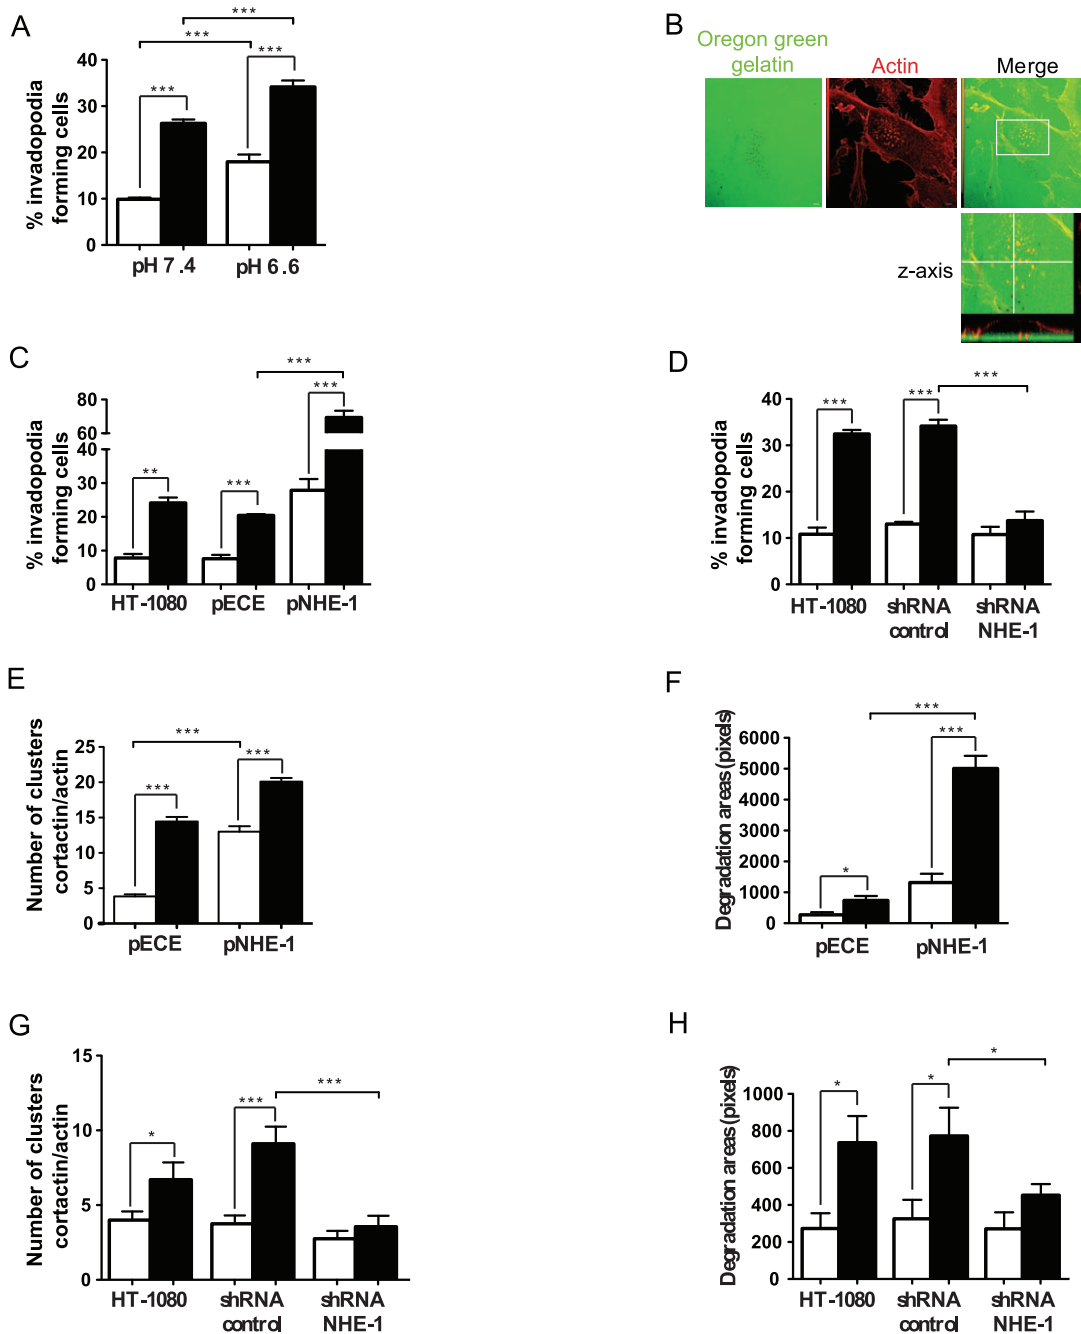

**Figure 3. Hypoxia-induced NHE-1 activity promotes invadopodia formation.** HT-1080 cells exposed to normoxic (empty bars) or hypoxic (filled bars) conditions were cultured on a layer of Oregon Green-labeled gelatin for 10 h and stained with Texas Red-phalloidin (actin) and DAPI (nucleus). The percentage of cells that formed invadopodia was determined by fluorescence microscopy. (A) Percentage of invadopodia-forming cells cultured in medium at pH 7.4 or 6.6 (n = 3). (B) Representative confocal microscopy image showing actin staining at sites of Oregon Green-gelatin degradation. Boxed area is enlarged in the corresponding lower panel. The merged image also shows a reconstruction of the x-z profile (inset) through the plane indicated by the solid line within the image. (C–D) Percentage of invadopodia-forming HT-1080 cells (C) transfected with pNHE-1 or an empty vector (pECE) (n = 3) or (D) transfected with control (scrambled) or NHE-1 shRNA (n = 3–4). Number of invadopodia formed per cell (actin/cortactin clusters), and corresponding area of degradation per cell, quantified from 20 random fields per experiment, in cells (E–F) transfected with pNHE-1 or an empty control vector (pECE) (n = 2–3) or (G–H) transfected with NHE-1 shRNA or control (scrambled) shRNA (n = 2–3). Columns represent the mean ± SEM indicated by the horizontal bars. The asterisks correspond to, \*  $p < 0.01$ ; \*\*  $p < 0.001$ ; \*\*\*  $p < 0.0001$ . doi:10.1371/journal.pone.0028851.g003

NHE-1 activation, HT-1080 cells were incubated in the presence or the absence of the selective p90RSK inhibitor BI-D1870 or, were transfected with a dominant negative form of p90RSK [41] prior to exposure to hypoxic conditions. Results showed that hypoxia-induced NHE-1 activity was inhibited by 60% and 40%

in cells treated with BI-D1870 or in cells expressing the dominant negative form of p90RSK, respectively (Figure 5B–5C). The need for NHE-1 Ser<sup>703</sup> phosphorylation in hypoxia-induced NHE-1 activation was investigated in HT-1080 cells transfected with a non-phosphorylatable mutant form (S703A) of NHE-1. Results

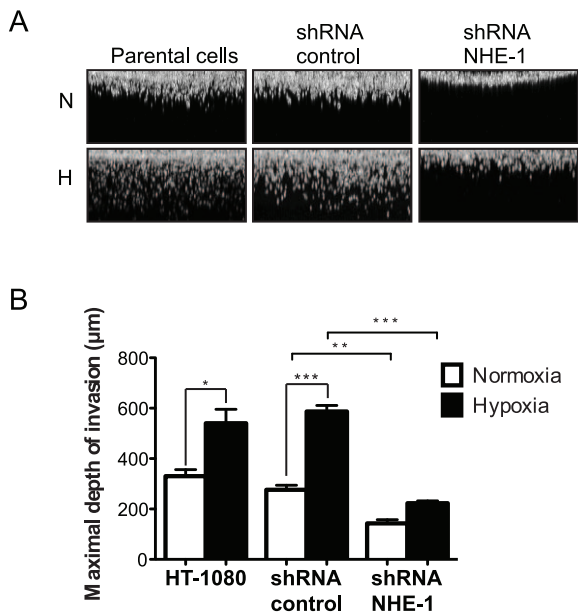

**Figure 4. NHE-1 is involved in hypoxia-induced cell invasion.** HT-1080 cells transfected with NHE-1 shRNA or control (scrambled) shRNA were allowed to invade collagen gels for 24 h under normoxia or hypoxia and stained with calcein-AM. (A) Representative confocal images showing the relative fluorescence intensity of the cells according to the depth of migration. (B) Graph represents maximal depth of invasion ( $n=3$ ). Columns represent the mean  $\pm$  SEM indicated by the horizontal bars. The asterisks correspond to, \*  $p<0.01$ ; \*\*  $p<0.001$ ; \*\*\*  $p<0.0001$ . doi:10.1371/journal.pone.0028851.g004

showed that cells harboring the mutant form of NHE-1 responded poorly to hypoxia, in contrast to control cells harboring wild type NHE-1 (Figure 5D) despite similar levels of overexpression (data not shown). Taken together, these results strongly suggested that phosphorylation of NHE-1 Ser<sup>703</sup> by p90RSK was part of the essential events involved in the activation of NHE-1 under hypoxia.

To evaluate the role of p90RSK in cell invasion promoted by hypoxia, we performed invadopodia formation assays in the presence or absence of inhibitors of p90RSK. Treatment of HT-1080 cells with BI-D1870 led to a dose-dependent decrease in invadopodia formation and function (area of degradation per cell) (Figure 6A–6B). A similar inhibition was observed in HT-1080 cells transfected with the dominant negative form of the kinase (Figure 6C). In addition, overexpression of the S703A NHE-1 mutant resulted in strong inhibition of HT-1080 ability to enhance invadopodia production in response to hypoxia as compared to cells transfected with wild type NHE-1 (Figure 6D). These results suggested that phosphorylation of NHE-1 by p90RSK was required, at least in part, for hypoxia-induced invadopodia formation and functions.

#### NHE-1 is located at sites of invadopodia formation in hypoxic cells

We next examined whether NHE-1 was localized at invadopodia sites using antibodies that recognize the C-terminal portion of human NHE-1. Results showed that increased amounts of NHE-1 were present in numerous discrete puncta of fluorescence at the ventral surface of hypoxic HT-1080 cells (basal plasma membrane stained with DiI) that corresponded to typical invadopodia locations (Figure 7A–7B). Such increases appeared to be

independent of NHE-1 phosphorylation by p90RSK because cells overexpressing the NHE-1 S703A mutant showed similar augmentations in NHE-1 localization at the basal plasma membrane in response to hypoxia compared to cells overexpressing the wild-type gene (Figure 7B). To define whether the observed areas of NHE-1 fluorescence at the basal plasma membrane corresponded to invadopodia formation sites, antibodies directed against cortactin were used. Results showed that ventral NHE-1 puncta co-localized with cortactin clusters under hypoxic conditions, suggesting NHE-1 localization to invadopodia structures in hypoxic cells (Figure 7C).

#### Discussion

The tumor hypoxic and acidic microenvironment exerts profound influence on cancer cell invasion and metastasis and these characteristics are considered as important targets for the development of new anti-cancer therapies. Despite numerous studies in this field, the fundamental relationship between pH- and hypoxia-induced cell invasion is still poorly understood. Here, we showed that hypoxia promoted NHE-1 activity and its relocation to the basal plasma membrane where NHE-1-induced extracellular acidification leads to invadopodia production and cell invasion. We further provided evidence that hypoxia modulated NHE-1 activity through the activation of p90RSK.

Hypoxia is a key factor in the initiation of cancer cell invasion in solid tumors [42]. To avoid cellular acidosis, hypoxia upregulates genes involved in pH<sub>i</sub> homeostasis such as CAIX and MCTs [43]. Yang et al. have recently reported that, NHE-1 activity and expression were increased by hypoxia in HepG2 cells [44]. NHE-1 contains a putative Hypoxia Response Element (HRE) in its promoter and has therefore been proposed to be a HIF-1-targeted gene [34]. In this study, we showed that the activity of NHE-1, but not its expression, was increased under hypoxia at times where we also observed an enhancement in the generation of invadopodia. Using shRNA-mediated HIF-1 $\alpha$  depletion, we also showed that the increase in NHE-1 activity was independent of the transcription factor HIF-1. Although HIF-1 has been reported to be a key effector of hypoxia for cancer cell invasion, recent studies have provided evidence for the implication of other signaling pathways. Hypoxia is known to regulate the activity of the kinase mammalian target of rapamycin (mTOR), to activate the unfolded protein response (UPR) and transcription factors such as NF- $\kappa$ B and C/EBP $\beta$  [45,46,47,48]. Furthermore, HIF-2, which is also stabilized under hypoxic conditions, can interact with HREs to upregulate gene expression [49]. Unpublished results from our laboratory have indicated that in fibrosarcoma cells, hypoxia-induced increase in invadopodia production occurred in cells where HIF-1 and HIF-2 have been silenced. These findings suggest that both HIF isoforms are not necessary for NHE-1 activation and invadopodia production triggered by hypoxia.

NHE-1 activity can be regulated through post-translational modifications, including phosphorylation of serine residues in the C-terminal cytoplasmic domain. Many protein kinases regulate NHE-1 activity, including p160ROCK, NIK and p90RSK [25]. Takahashi et al. have reported that p90RSK phosphorylates NHE-1 at Ser<sup>703</sup> resulting in increased activity of the exchanger in response to PDGF [26]. Here, inhibition of p90RSK or transfection with a dominant negative form of the kinase led to a strong, but incomplete, loss of NHE-1 activity (Figure 5B–5C). Similar results were observed by overexpression of a NHE-1 S703A mutant (Figure 5D), providing evidence of a direct modulation of NHE-1 by p90RSK. In addition, our results indicated an increase in p90RSK-dependent NHE-1 Ser<sup>703</sup>

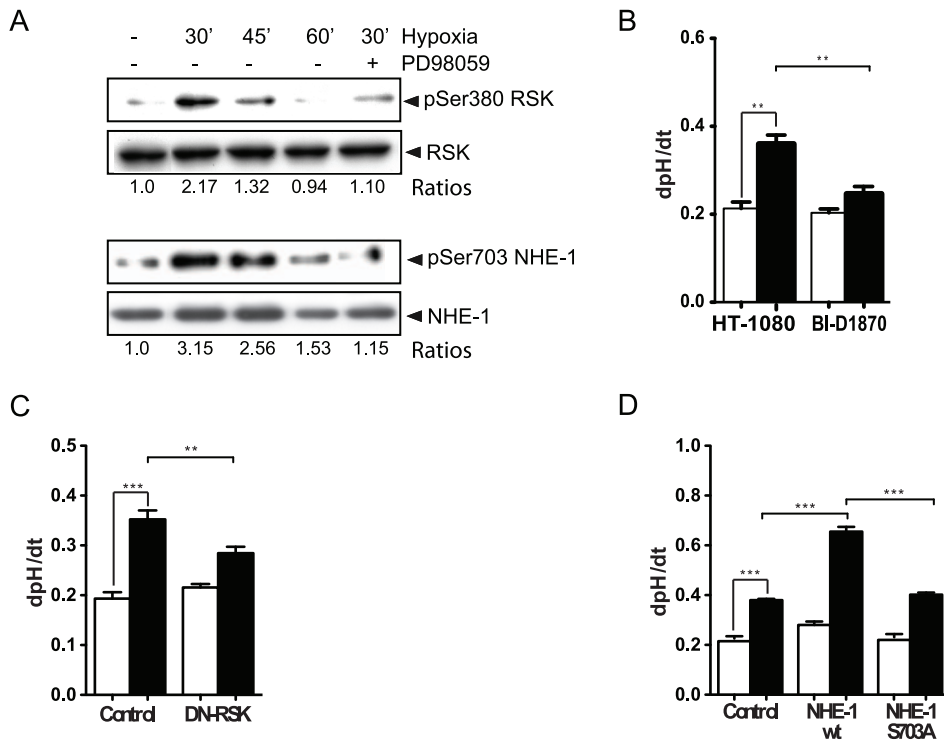

**Figure 5. RSK-induced NHE-1 phosphorylation increases its activity in hypoxia.** (A) HT-1080 cells were cultured for the indicated periods of time under normoxic or hypoxic conditions or for 30 min under hypoxia with the addition of the MEK1/2 inhibitor PD98059 (50  $\mu$ M). Representative immunoblots showing p90RSK Ser<sup>380</sup> phosphorylation and NHE-1 Ser<sup>703</sup> phosphorylation. NHE-1 phosphorylation was revealed using antibodies directed against the 14-3-3 binding motif, following NHE-1 immunoprecipitation. Ratios of pRSK to total RSK and pNHE-1 to total NHE-1 are shown ( $n=3$ ). (B-D)  $\text{Na}^+/\text{H}^+$  exchange rates were measured in cells exposed to normoxia (empty bars) or hypoxia (filled bars) in (B) the presence or absence of the p90RSK inhibitor BI-D1870 (10  $\mu$ M) ( $n=3$ ), or (C) cells transfected with a dominant negative p90RSK ( $n=3$ ), or (D) cells transfected with WT NHE-1 or a S703A substitution NHE-1 mutant ( $n=3$ ). Columns represent the mean  $\pm$  SEM indicated by the horizontal bars. The asterisks correspond to, \*\*  $p<0.001$ ; \*\*\*  $p<0.0001$ . doi:10.1371/journal.pone.0028851.g005

phosphorylation following a brief (30 min) exposure of the cells to hypoxia. This observation was consistent with previous results that showed that p90RSK was rapidly activated by hypoxia in cardiac myocytes [50]. Beside p90RSK, several protein kinases can phosphorylate NHE-1 in its C-terminal tail, including p160ROCK and NIK [25]. p160ROCK is upregulated in various cancers and it has been shown to be involved in invadopodia formation [51]. ROCK is activated in hypoxia through VEGF, in a HIF-1-independent manner [52]. These data suggest that, in addition to p90RSK, the possibility exists for further regulations of NHE-1 activity under hypoxic conditions.

p90RSK has been associated with cell proliferation and cell survival [53] and recent reports have shown that p90RSK is overexpressed in human prostate and breast cancers where it is involved in cell proliferation (breast, prostate) and PSA expression (prostate) [54,55]. Beside the emerging role of p90 RSK in cancer [56], few studies have investigated its implication in cell invasion processes. In this connection, RSK was shown to enhance the migration of melanoma cells through phosphorylation of the cytoskeletal protein filamin-A [57]. Here, we found that inhibition of p90RSK or the use of a dominant negative mutant partially reduced hypoxia- and NHE-1-induced invadopodia production. Overexpression of a NHE-1 S703A mutant also partially inhibited hypoxia-induced invadopodia formation as compared to wild-type gene. The question of which exact mechanisms regulate p90RSK activation under hypoxia is currently unknown and will be the subject of future investigations. Results presented here (Figure 5A)

and from unpublished experiments have indicated that the EGFR/ERK/MAPK pathway, which is activated under hypoxic conditions [58,59,60], is possibly involved in p90RSK activation.

Hypoxia induced the relocalization of NHE-1 to the plasma membrane and its colocalization with the invadopodia marker cortactin. These results were consistent with a recent study indicating similar localization of NHE-1 to invadopodia in breast cancer cells stimulated with EGF where the exchanger was responsible for extracellular acidification and degradation of the ECM [24]. Despite repeated observations of NHE-1 at invadopodia, the trafficking and/or segregation mechanisms involved in NHE-1 location to these sites remain unknown. It has been reported that NHE-1 is present in lipid rafts microdomains, where it interacts with caveolin-1 [61]. Lipid rafts and caveolin-1 are required for invadopodia formation and ECM degradation by human breast cancer cells. Src, a non-receptor tyrosine kinase known to be activated by hypoxia, has been shown to regulate the localization of caveolin-1 at invadopodia formation sites [62,63]. Therefore, the hypoxic regulation of caveolin-1 in lipid rafts may represent a potential mechanism for relocalization of NHE-1 to invadopodia.

The intrinsic ability to propagate to distant sites is the hallmark of malignant diseases and the leading cause of cancer death. Alterations in tumor cell metabolism are strongly associated with metastatic potential, which has become a central issue in cancer treatment [64]. Because of the central role of NHE-1 in pH regulation of malignant cells, it is being considered as a potential

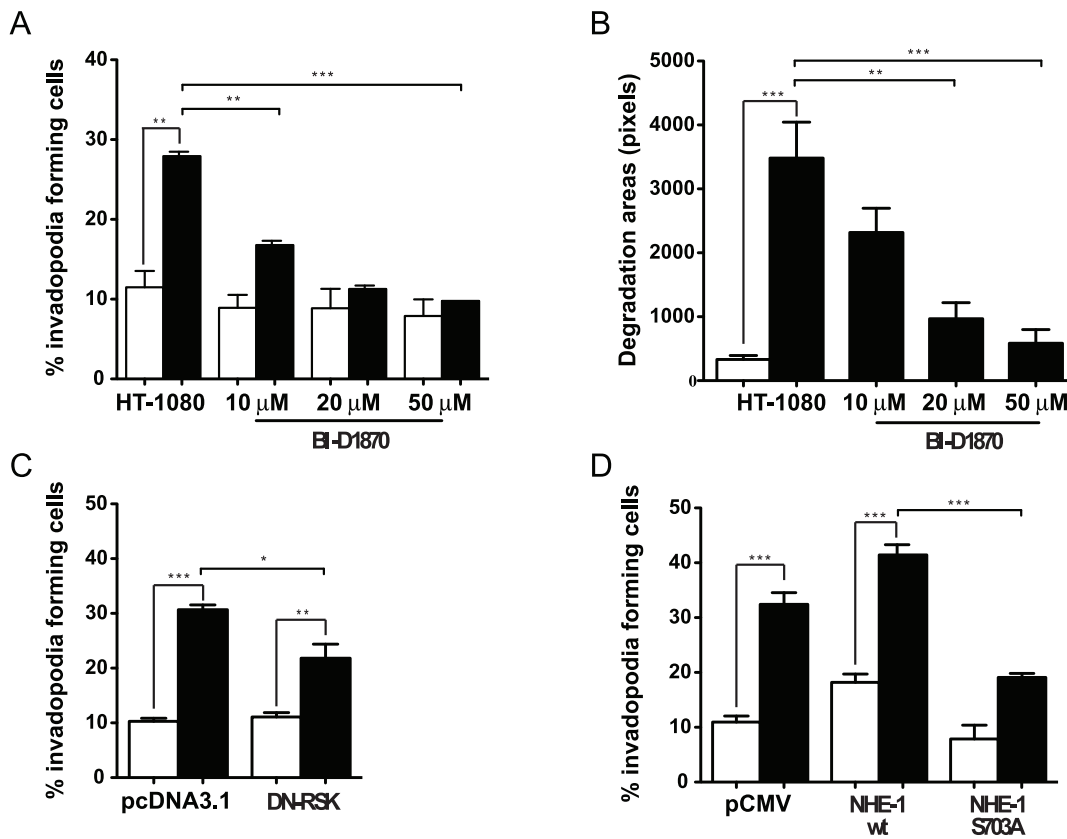

**Figure 6. Hypoxia-induced RSK activation promotes invadopodia formation.** HT-1080 cells were cultured under normoxia (empty bars) or hypoxia (filled bars). (A) Percentage of cells producing invadopodia cultured in presence or absence of BI-D1870 ( $n=3$ ). (B) Quantification of invadopodia-associated matrix degradation was performed ( $n=2$ ). (C–D) Percentage of HT-1080 cells producing invadopodia in cells (C) transfected with DN-RSK ( $n=3$ ), or (D) transfected with NHE-1 WT or S703A ( $n=3$ ). Columns represent the mean  $\pm$  SEM indicated by the horizontal bars. The asterisks correspond to, \*  $p<0.01$ ; \*\*  $p<0.001$ ; \*\*\*  $p<0.0001$ . doi:10.1371/journal.pone.0028851.g006

target in anti-cancer therapy. However, recent clinical studies aimed at inhibiting NHE-1 in the setting of myocardial infarction have shown disappointing efficacy with severe adverse effects [65]. Understanding the molecular mechanisms that regulate NHE-1 activity under pathological conditions is needed to develop alternative strategies to counteract the activity of the exchanger. Our findings identified p90RSK as a molecular link between NHE-1-induced extracellular acidification and invadopodia formation, providing new insights into the cooperation between hypoxia and the acidic microenvironment during cell invasion. Selective inhibition of p90RSK may be a promising approach to interfere with the metastatic potential of metabolically transformed cancer cells.

Beside cancer, the development of several hypoxia-associated diseases including pulmonary artery hypertension, myocardial infarction and ischemic retinopathies has been linked to NHE-1 activity and cardiac-specific overexpression of a dominant negative form of RSK has been shown to reduce cardiac ischemia-reperfusion injury [66,67,68,69,70]. Selective inhibition of molecular mechanisms leading to NHE-1 activation may therefore represent an alternative approach to attenuate the deleterious influence of the metabolic microenvironment in various diseases.

## Materials and Methods

### Antibodies and reagents

Antibodies used for IF microscopy or Western-blotting were purchased through commercial sources. Antibodies (and their

dilutions) were as follows: Rabbit anti-14-3-3 binding motif, anti-RSK and anti-phosphoRSK (Ser<sup>380</sup>) (WB: 1/1000) were purchased from Cell Signaling (Danvers, MA). Mouse anti-tubulin (WB: 1/1000) and rabbit anti-actin (WB : 1/5000) was purchased from Sigma-Aldrich (St-Louis, MO). Mouse anti-cortactin clone 4F11 (WB: 1/1000, IF: 1/300) was purchased from Millipore (Billerica, MA). 4',6-diamidino-2-phenylindol dilactate (DAPI), Texas Red-X phalloidin (IF:1/200), Alexa Fluor 647-phalloidin (IF: 1/50), and all Alexa Fluor secondary antibodies (IF: 1/200) were from Invitrogen (Eugene, OR). Goat anti-NHE1 was purchased from Santa Cruz Biotechnology (Santa-Cruz, CA). Mouse anti-NHE1 (WB: 1/500) was obtained from BD Biosciences (San Jose, CA). Anti-human NHE1 antibody N1P1 was a generous gift of Dr. Josette Noël (University of Montreal, Montreal, QC). NHE-1 inhibitors, ethyl-iso-propylamiloride (EIPA) and ConcavalinA were purchased from Sigma-Aldrich. 2',7'-Bis-(2-carboxyethyl)-5-(and-6)-carboxyfluorescein, acetoxy-methyl ester (BCECF, AM) was from Invitrogen. Control shRNA and shRNA against the 5'UTR region of NHE-1 were purchased from SABiosciences (Frederick, MD). M-Methyl-D-glucamine chloride (NMDG) was a kind gift of Dr. Eric Rousseau (University of Sherbrooke, Sherbrooke, QC).

### Cell cultures

HT-1080 fibrosarcoma cells (ATCC, Rockville, MD) were cultured in Minimal Essential Medium (MEM; Gibco BRL,



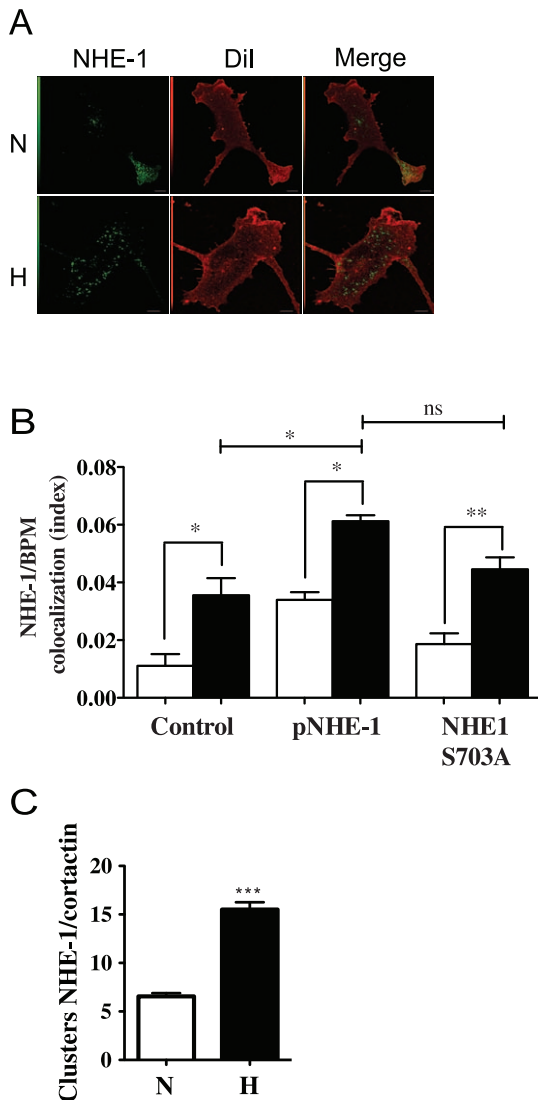

**Figure 7. NHE-1 is localized at invadopodia sites.** (A) Representative confocal microscopy images showing NHE-1 staining at the basal membrane (labeled with Dil) in HT-1080 cells cultured under normoxic or hypoxic conditions. (B) Colocalization index of NHE-1 and basal plasma membrane (BPM) for untransfected cells or cells transfected with WT NHE-1 or a S703A substitution NHE-1 mutant exposed to normoxic (empty bars) or hypoxic (solid bars) conditions ( $n=3$ ). (C) Numbers of cortactin/NHE-1 clusters per cell were quantified in HT-1080 cells cultured under normoxia or hypoxia for 4 h ( $n=3$ ). N, normoxia; H, hypoxia. Columns represent the mean  $\pm$  SEM indicated by the horizontal bars. The asterisks correspond to, \*  $p<0.01$ ; \*\*  $p<0.001$ ; \*\*\*  $p<0.0001$ . doi:10.1371/journal.pone.0028851.g007

Burlington, ON) supplemented with 10% fetal bovine serum and 40  $\mu\text{g/ml}$  gentamycin (Sandoz, Montreal, QC) in a humidified 95%  $\text{O}_2$  5%  $\text{CO}_2$  atmosphere at 37°C. In the case of hypoxic stimulations, cells were incubated at 37°C in an In vivo<sub>2</sub> 400 hypoxic workstation (Ruskin, Les Produits Scientifiques ESBE, Ville St-Laurent, QC) under an atmosphere of 1%  $\text{O}_2$  and 5%  $\text{CO}_2$ .

#### Plasmids and transfections

pECE-NHE1-GFP was a generous gift from Dr. Jacques Pouyssegur (Institute of Developmental Biology and Cancer

Research, Nice, France). pCMV-NHE1-HA was a kind gift of Dr. John Orłowski (McGill University, Montreal, Canada). The plasmids pCMV-NHE1-S703A and pcDNA3.1-DN-RSK were generously provided by Dr. Bradford Berk (Aab Cardiovascular Institute, Rochester, NY). shRNA against NHE-1 was purchased from SABiosciences. Transfections were performed using the FuGENE 6 according to the manufacturer's protocol (Roche Diagnostics, Laval, QC). Stable transfectants were selected and maintained in puromycin (Cedarlane) supplemented medium.

#### Measurement of NHE-1 activity

Intracellular pH ( $\text{pH}_i$ ) was measured by confocal microscopy using a fluorescent pH-sensitive probe (BCECF), as described [61]. Briefly, cells were incubated with "Na<sup>+</sup> Ringer" solution containing the BCECF probe (2  $\mu\text{M}$ ) for 20 min at 37°C. After washing, the cells were mounted on an Olympus confocal microscope and excited at 450 nm and 488 nm. Emitted fluorescence was collected at 535 nm, at 30 s intervals. NHE-1 activity was determined by measuring the rate of  $\text{pH}_i$  recovery ( $\text{dpH}_i/\text{dt}$ ) from an acid load produced by addition of  $\text{NH}_4\text{Cl}$  (20 mM). In the case of experiments performed under hypoxic conditions, cells were maintained under the confocal microscope equipped with a chamber containing a gas mixture of 1%  $\text{O}_2$  and 5%  $\text{CO}_2$  at 37°C.

#### RNA isolation and qRT-PCR

Total cellular RNA was isolated using the TRI-Reagent protocol (Invitrogen, Carlsbad, CA) as described [71]. Quantitative real time PCR was performed using the QuantiTect SYBR Green PCR kit (Qiagen) and a Rotor-Gene 3000 instrument (Corbett Research, San Francisco, CA). Primer sequences were as follows: NHE-1 forward (5'-CCAGCTCATTGCCTTCTACC-3'), NHE-1 reverse (5'-TGTGTCTGTTGTAGGACCGC-3'), RPLPO forward (5'-GATTACACCTTCCCAGTTGC-3'), RPLPO reverse (5'-CCA-AATCCCATATCCTCGTCCG-3'). Each reaction was run in duplicates and values were normalized against the RPLPO housekeeping gene.

#### Immunoprecipitation and Western blotting

Cells were lysed on ice in RIPA buffer. Cell lysates were centrifuged at 13,000 rpm at 4°C and protein concentration was determined using the BCA reagent (BioLynx Inc, Brockville, ON). Immunoblotting was performed as described [72]. In the case of immunoprecipitation experiments, 350  $\mu\text{g}$  of total proteins were immunoprecipitated using an anti-NHE-1 antibody (dilution, 1:100). To detect RSK-induced NHE1 phosphorylation on Ser<sup>703</sup>, an anti-14-3-3 binding motif antibody, was used as described [40].

#### Invadopodia assays

Invadopodia assays were performed as described [32]. Briefly, cells were plated on Oregon Green- or Alexa Fluor 488-labeled gelatin and invadopodia were identified by areas of matrix degradation characterized by a loss of fluorescence. All experiments were performed at pH 7.4, unless indicated within figure legends.

#### Three-dimensional invasion assays

Three-dimensional invasion assays were performed as reported [73].

#### Immunofluorescence

Cells were fixed with 1% PFA for 30 min at 4°C, permeabilized with saponin (0.05% in PBS) for 20 min, and blocked in 2% BSA

in PBS for 30 min. Cells were then incubated with the appropriate primary and secondary antibodies or fluorescent phalloidin, as indicated in the legends of the figures. Images were taken with a FV1000 scanning Olympus confocal microscope coupled to an inverted microscope, using a 63× oil immersion objective. To quantitate plasma membrane-located NHE-1, the basal cell surface layer (first layer in contact with matrix) was scanned and NHE-1 and plasma membrane colocalization index was calculated according to Manders *et al.* [74]. Actin/cortactin colocalization and degradation areas were determined as described [32].

### Statistical analysis

Paired or unpaired Student's *t*-test or one-way ANOVA test was used to assess statistical significance, which was set at  $p < 0.05$ .

### Supporting Information

**Figure S1 NHE-1 is involved in hypoxia-induced extracellular acidification and invadopodia formation in MDA-MB 231 and B16 cells.** Human MDA-MB-231 breast cancer cells and mouse B16 melanoma cells were exposed to normoxic (empty columns) or hypoxic (filled columns) conditions.  $\text{Na}^+/\text{H}^+$  exchange rates were measured in (A) MDA-MB-231 cells and (B) B16 cells incubated in the presence or absence of the NHE-1 inhibitor EIPA (25  $\mu\text{M}$ ). For invadopodia assays, cells were incubated in the presence or absence of the NHE-1 inhibitors EIPA (25  $\mu\text{M}$ ) or Zoniporide (100 nM) and the percentage of cells forming invadopodia was determined by fluorescence microscopy for (C) MDA-MB-231 cells and (D) B16 cells. Columns represent

the mean  $\pm$  SEM indicated by the horizontal bars. The asterisks correspond to, \*  $p < 0.01$ ; \*\*  $p < 0.001$ ; \*\*\*  $p < 0.0001$ . (EPS)

**Figure S2 Inhibition of NHE-1 activity by EIPA reduces invadopodia formation.** HT-1080 cells exposed to normoxic (empty columns) or hypoxic (filled columns) conditions were cultured on Oregon Green gelatin for 10 h and stained with Texas Red-phalloidin (actin) and DAPI (nucleus). The percentage of cells that formed invadopodia was determined by fluorescence microscopy. (A) Percentage of invadopodia forming cells cultured in presence or absence of two different concentrations of the NHE-1 activity inhibitor EIPA ( $n = 3$ ). (B) Number of invadopodia formed per cell (actin-cortactin clusters) in HT-1080 cells cultured in the presence or absence of EIPA (25  $\mu\text{M}$ ). Columns represent the mean  $\pm$  SEM indicated by the horizontal bars. The asterisks correspond to, \*\*\*  $P < 0.0001$ . (EPS)

### Acknowledgments

We thank Drs. Gilles Dupuis, Annie Lauzier and Martine Charbonneau for critical reading of the manuscript and Dr. Leonid Volkov for assistance with confocal microscopy experiments.

### Author Contributions

Conceived and designed the experiments: CMD FL. Performed the experiments: FL DA KBG. Analyzed the data: DA. Wrote the paper: CMD FL KH.

### References

- Finger EC, Giaccia AJ (2010) Hypoxia, inflammation, and the tumor microenvironment in metastatic disease. *Cancer Metastasis Rev* 29: 285–293.
- Parks SK, Chiche J, Pouyssegur J (2011) pH control mechanisms of tumor survival and growth. *J Cell Physiol* 226: 299–308.
- Ruan K, Song G, Ouyang G (2009) Role of hypoxia in the hallmarks of human cancer. *J Cell Biochem* 107: 1053–1062.
- Hockel M, Schlenger K, Hockel S, Vaupel P (1999) Hypoxic cervical cancers with low apoptotic index are highly aggressive. *Cancer Res* 59: 4525–4528.
- Hockel M, Vaupel P (2001) Tumor hypoxia: definitions and current clinical, biologic, and molecular aspects. *J Natl Cancer Inst* 93: 266–276.
- Marin-Hernandez A, Gallardo-Perez JC, Ralph SJ, Rodriguez-Enriquez S, Moreno-Sanchez R (2009) HIF-1 $\alpha$  modulates energy metabolism in cancer cells by inducing over-expression of specific glycolytic isoforms. *Mini Rev Med Chem* 9: 1084–1101.
- McCarty MF, Whitaker J (2010) Manipulating tumor acidification as a cancer treatment strategy. *Altern Med Rev* 15: 264–272.
- Wike-Hooley JL, Van der Zee J, van Rhoon GC, Van den Berg AP, Reinhold HS (1984) Human tumour pH changes following hyperthermia and radiation therapy. *Eur J Cancer Clin Oncol* 20: 619–623.
- Kallinowski F, Schlenger KH, Kloes M, Stohrer M, Vaupel P (1989) Tumor blood flow: the principal modulator of oxidative and glycolytic metabolism, and of the metabolic microenvironment of human tumor xenografts in vivo. *Int J Cancer* 44: 266–272.
- Griffiths JR (1991) Are cancer cells acidic? *Br J Cancer* 64: 425–427.
- Gillies RJ, Raghunand N, Karczmar GS, Bhujwala ZM (2002) MRI of the tumor microenvironment. *J Magn Reson Imaging* 16: 430–450.
- Xu L, Fukumura D, Jain RK (2002) Acidic extracellular pH induces vascular endothelial growth factor (VEGF) in human glioblastoma cells via ERK1/2 MAPK signaling pathway: mechanism of low pH-induced VEGF. *J Biol Chem* 277: 11368–11374.
- Xu L, Fidler IJ (2000) Acidic pH-induced elevation in interleukin 8 expression by human ovarian carcinoma cells. *Cancer Res* 60: 4610–4616.
- Rofstad EK, Mathiesen B, Kindem K, Galappathi K (2006) Acidic extracellular pH promotes experimental metastasis of human melanoma cells in athymic nude mice. *Cancer Res* 66: 6699–6707.
- Stock C, Cardone RA, Busco G, Krahling H, Schwab A, et al. (2008) Protons extruded by NHE1: digestive or glue? *Eur J Cell Biol* 87: 591–599.
- Taves J, Rastedt D, Canine J, Mork D, Wallert MA, et al. (2008) Sodium hydrogen exchanger and phospholipase D are required for alpha1-adrenergic receptor stimulation of metalloproteinase-9 and cellular invasion in CCL39 fibroblasts. *Arch Biochem Biophys* 477: 60–66.
- Bourguignon LY, Singleton PA, Diedrich F, Stern R, Gilad E (2004) CD44 interaction with  $\text{Na}^+/\text{H}^+$  exchanger (NHE1) creates acidic microenvironments leading to hyaluronidase-2 and cathepsin B activation and breast tumor cell invasion. *J Biol Chem* 279: 26991–27007.
- Robey IF, Baggett BK, Kirkpatrick ND, Roe DJ, Dosesu J, et al. (2009) Bicarbonate increases tumor pH and inhibits spontaneous metastases. *Cancer Res* 69: 2260–2268.
- Kinsella JL, Heller P, Froehlich JP (1998)  $\text{Na}^+/\text{H}^+$  exchanger: proton modifier site regulation of activity. *Biochem Cell Biol* 76: 743–749.
- Reshkin SJ, Bellizzi A, Caldeira S, Albarani V, Malanchi I, et al. (2000)  $\text{Na}^+/\text{H}^+$  exchanger-dependent intracellular alkalization is an early event in malignant transformation and plays an essential role in the development of subsequent transformation-associated phenotypes. *FASEB J* 14: 2185–2197.
- Steffan JJ, Snider JL, Skalli O, Welbourne T, Cardelli JA (2009)  $\text{Na}^+/\text{H}^+$  exchangers and RhoA regulate acidic extracellular pH-induced lysosome trafficking in prostate cancer cells. *Traffic* 10: 737–753.
- Paradiso A, Cardone RA, Bellizzi A, Bagorda A, Guerra L, et al. (2004) The  $\text{Na}^+/\text{H}^+$  exchanger-1 induces cytoskeletal changes involving reciprocal RhoA and Rac1 signaling, resulting in motility and invasion in MDA-MB-435 cells. *Breast Cancer Res* 6: R616–628.
- Putney LK, Barber DL (2004) Expression profile of genes regulated by activity of the  $\text{Na}^+/\text{H}^+$  exchanger NHE1. *BMC Genomics* 5: 46.
- Busco G, Cardone RA, Greco MR, Bellizzi A, Colella M, et al. (2010) NHE1 promotes invadopodial ECM proteolysis through acidification of the perinvadopodial space. *FASEB J* 24: 3903–3915.
- Baumgartner M, Patel H, Barber DL (2004)  $\text{Na}^+/\text{H}^+$  exchanger NHE1 as plasma membrane scaffold in the assembly of signaling complexes. *Am J Physiol Cell Physiol* 287: C844–850.
- Takahashi E, Abe J, Gallis B, Aebersold R, Spring DJ, et al. (1999) p90(RSK) is a serum-stimulated  $\text{Na}^+/\text{H}^+$  exchanger isoform-1 kinase. Regulatory phosphorylation of serine 703 of  $\text{Na}^+/\text{H}^+$  exchanger isoform-1. *J Biol Chem* 274: 20206–20214.
- Coopman PJ, Do MT, Thompson EW, Mueller SC (1998) Phagocytosis of cross-linked gelatin matrix by human breast carcinoma cells correlates with their invasive capacity. *Clin Cancer Res* 4: 507–515.
- Monsky WL, Lin CY, Aoyama A, Kelly T, Akiyama SK, et al. (1994) A potential marker protease of invasiveness, seprase, is localized on invadopodia of human malignant melanoma cells. *Cancer Res* 54: 5702–5710.
- Chen WT (1996) Proteases associated with invadopodia, and their role in degradation of extracellular matrix. *Enzyme Protein* 49: 59–71.
- Buccione R, Caldieri G, Ayala I (2009) Invadopodia: specialized tumor cell structures for the focal degradation of the extracellular matrix. *Cancer Metastasis Rev* 28: 137–149.

31. Kimura F, Iwaya K, Kawaguchi T, Kaise H, Yamada K, et al. (2010) Epidermal growth factor-dependent enhancement of invasiveness of squamous cell carcinoma of the breast. *Cancer Sci* 101: 1133–1140.
32. Harper K, Arsenault D, Boulay-Jean S, Lauzier A, Lucien F, et al. (2010) Autotaxin promotes cancer invasion via the lysophosphatidic acid receptor 4: participation of the cyclic AMP/EPAC/Rac1 signaling pathway in invadopodia formation. *Cancer Res* 70: 4634–4643.
33. Mandal S, Johnson KR, Wheelock MJ (2008) TGF-beta induces formation of F-actin cores and matrix degradation in human breast cancer cells via distinct signaling pathways. *Exp Cell Res* 314: 3478–3493.
34. Shimoda LA, Fallon M, Pisarcik S, Wang J, Semenza GL (2006) HIF-1 regulates hypoxic induction of NHE1 expression and alkalinization of intracellular pH in pulmonary arterial myocytes. *Am J Physiol Lung Cell Mol Physiol* 291: L941–949.
35. Artym VV, Zhang Y, Seillier-Moisewitsch F, Yamada KM, Mueller SC (2006) Dynamic interactions of cortactin and membrane type 1 matrix metalloproteinase at invadopodia: defining the stages of invadopodia formation and function. *Cancer Res* 66: 3034–3043.
36. Wolf K, Mazo I, Leung H, Engelke K, von Andrian UH, et al. (2003) Compensation mechanism in tumor cell migration: mesenchymal-amoeboid transition after blocking of pericellular proteolysis. *J Cell Biol* 160: 267–277.
37. Denker SP, Barber DL (2002) Cell migration requires both ion translocation and cytoskeletal anchoring by the Na-H exchanger NHE1. *J Cell Biol* 159: 1087–1096.
38. Denker SP, Huang DC, Orłowski J, Furthmayr H, Barber DL (2000) Direct binding of the Na-H exchanger NHE1 to ERM proteins regulates the cortical cytoskeleton and cell shape independently of H(+) translocation. *Mol Cell* 6: 1425–1436.
39. Schwab A, Hanley P, Fabian A, Stock C (2008) Potassium channels keep mobile cells on the go. *Physiology (Bethesda)* 23: 212–220.
40. Garciaarena CD, Caldiz CI, Portiansky EL, Chiappe de Cingolani GE, Ennis IL (2009) Chronic NHE-1 blockade induces an antiapoptotic effect in the hypertrophied heart. *J Appl Physiol* 106: 1325–1331.
41. Spring DJ, Krebs EG (1999) Deletion of 11 amino acids in p90(rsk-mo-1) abolishes kinase activity. *Mol Cell Biol* 19: 317–320.
42. Bertout JA, Patel SA, Simon MC (2008) The impact of O<sub>2</sub> availability on human cancer. *Nat Rev Cancer* 8: 967–975.
43. Stock C, Schwab A (2009) Protons make tumor cells move like clockwork. *PLoS Arch* 458: 981–992.
44. Yang X, Wang D, Dong W, Song Z, Dou K (2010) Inhibition of Na(+)/H(+) exchanger 1 by 5-(N-ethyl-N-isopropyl) amiloride reduces hypoxia-induced hepatocellular carcinoma invasion and motility. *Cancer Lett* 295: 198–204.
45. Belaiba RS, Bonello S, Zahringer C, Schmidt S, Hess J, et al. (2007) Hypoxia up-regulates hypoxia-inducible factor-1alpha transcription by involving phosphatidylinositol 3-kinase and nuclear factor kappaB in pulmonary artery smooth muscle cells. *Mol Biol Cell* 18: 4691–4697.
46. Bonello S, Zahringer C, Belaiba RS, Djordjevic T, Hess J, et al. (2007) Reactive oxygen species activate the HIF-1alpha promoter via a functional NFkappaB site. *Arterioscler Thromb Vasc Biol* 27: 755–761.
47. Park YK, Park H (2010) Prevention of CCAAT/enhancer-binding protein beta DNA binding by hypoxia during adipogenesis. *J Biol Chem* 285: 3289–3299.
48. Wouters BG, Koritzinsky M (2008) Hypoxia signalling through mTOR and the unfolded protein response in cancer. *Nat Rev Cancer* 8: 851–864.
49. Wenger RH (2002) Cellular adaptation to hypoxia: O<sub>2</sub>-sensing protein hydroxylases, hypoxia-inducible transcription factors, and O<sub>2</sub>-regulated gene expression. *FASEB J* 16: 1151–1162.
50. Seko Y, Tobe K, Takahashi N, Kaburagi Y, Kadowaki T, et al. (1996) Hypoxia and hypoxia/reoxygenation activate Src family tyrosine kinases and p21ras in cultured rat cardiac myocytes. *Biochem Biophys Res Commun* 226: 530–535.
51. Vishnubhotla R, Sun S, Huq J, Bulic M, Ramesh A, et al. (2007) ROCK-II mediates colon cancer invasion via regulation of MMP-2 and MMP-13 at the site of invadopodia as revealed by multiphoton imaging. *Lab Invest* 87: 1149–1158.
52. Mizukami Y, Fujiki K, Duerr EM, Gala M, Jo WS, et al. (2006) Hypoxic regulation of vascular endothelial growth factor through the induction of phosphatidylinositol 3-kinase/Rho/ROCK and c-Myc. *J Biol Chem* 281: 13957–13963.
53. Frodin M, Gammeltoft S (1999) Role and regulation of 90 kDa ribosomal S6 kinase (RSK) in signal transduction. *Mol Cell Endocrinol* 151: 65–77.
54. Clark DE, Errington TM, Smith JA, Frierson HF, Jr., Weber MJ, et al. (2005) The serine/threonine protein kinase, p90 ribosomal S6 kinase, is an important regulator of prostate cancer cell proliferation. *Cancer Res* 65: 3108–3116.
55. Smith JA, Potec-Smith CE, Xu Y, Errington TM, Hecht SM, et al. (2005) Identification of the first specific inhibitor of p90 ribosomal S6 kinase (RSK) reveals an unexpected role for RSK in cancer cell proliferation. *Cancer Res* 65: 1027–1034.
56. Romeo Y, Roux PP (2011) Paving the way for targeting RSK in cancer. *Expert Opin Ther Targets* 15: 5–9.
57. Woo MS, Ohta Y, Rabinovitz I, Stosel TP, Blenis J (2004) Ribosomal S6 kinase (RSK) regulates phosphorylation of filamin A on an important regulatory site. *Mol Cell Biol* 24: 3025–3035.
58. Lee E, Yim S, Lee SK, Park H (2002) Two transactivation domains of hypoxia-inducible factor-1alpha regulated by the MEK-1/p42/p44 MAPK pathway. *Mol Cells* 14: 9–15.
59. Liu L, Zhang H, Sun L, Gao Y, Jin H, et al. (2010) ERK/MAPK activation involves hypoxia-induced MGR1-Ag/37LRP expression and contributes to apoptosis resistance in gastric cancer. *Int J Cancer* 127: 820–829.
60. Mishra OP, Ashraf QM, Delivoria-Papadopoulos M (2010) Hypoxia-induced activation of epidermal growth factor receptor (EGFR) kinase in the cerebral cortex of newborn piglets: the role of nitric oxide. *Neurochem Res* 35: 1471–1477.
61. Tekpli X, Huc L, Lacroix J, Rissel M, Poet M, et al. (2008) Regulation of Na+/H+ exchanger 1 allosteric balance by its localization in cholesterol- and caveolin-rich membrane microdomains. *J Cell Physiol* 216: 207–220.
62. Caldieri G, Giacchetti G, Beznoussenko G, Attanasio F, Ayala I, et al. (2009) Invadopodia biogenesis is regulated by caveolin-mediated modulation of membrane cholesterol levels. *J Cell Mol Med* 13: 1728–1740.
63. Yamaguchi H, Takeo Y, Yoshida S, Kouchi Z, Nakamura Y, et al. (2009) Lipid rafts and caveolin-1 are required for invadopodia formation and extracellular matrix degradation by human breast cancer cells. *Cancer Res* 69: 8594–8602.
64. Hanahan D, Weinberg RA (2011) Hallmarks of cancer: the next generation. *Cell* 144: 646–674.
65. Avkiran M, Cook AR, Cuello F (2008) Targeting Na+/H+ exchanger regulation for cardiac protection: a RSKy approach? *Curr Opin Pharmacol* 8: 133–140.
66. Corvera JS, Zhao ZQ, Schmarkey LS, Katzmark SL, Budde JM, et al. (2003) Optimal dose and mode of delivery of Na+/H+ exchange-1 inhibitor are critical for reducing postsurgical ischemia-reperfusion injury. *Ann Thorac Surg* 76: 1614–1622.
67. Karmazyn M, Sostaric JV, Gan XT (2001) The myocardial Na+/H+ exchanger: a potential therapeutic target for the prevention of myocardial ischemic and reperfusion injury and attenuation of postinfarction heart failure. *Drugs* 61: 375–389.
68. Maekawa N, Abe J, Shishido T, Itoh S, Ding B, et al. (2006) Inhibiting p90 ribosomal S6 kinase prevents (Na+)-H+ exchanger-mediated cardiac ischemia-reperfusion injury. *Circulation* 113: 2516–2523.
69. Rios EJ, Fallon M, Wang J, Shimoda LA (2005) Chronic hypoxia elevates intracellular pH and activates Na+/H+ exchange in pulmonary arterial smooth muscle cells. *Am J Physiol Lung Cell Mol Physiol* 289: L867–874.
70. Yu L, Quinn DA, Garg HG, Hales CA (2008) Deficiency of the NHE1 gene prevents hypoxia-induced pulmonary hypertension and vascular remodeling. *Am J Respir Crit Care Med* 177: 1276–1284.
71. Chomczynski P (1993) A reagent for the single-step simultaneous isolation of RNA, DNA and proteins from cell and tissue samples. *Biotechniques* 15: 532–534, 536–537.
72. Blanchette F, Rivard N, Rudd P, Grondin F, Attisano L, et al. (2001) Cross-talk between the p42/p44 MAP kinase and Smad pathways in transforming growth factor beta 1-induced furin gene transactivation. *J Biol Chem* 276: 33986–33994.
73. Arsenault D, Lucien F, Dubois CM (2011) Hypoxia enhances cancer cell invasion through relocalization of the proprotein convertase furin from the trans-Golgi network to the cell surface. *J Cell Physiol*.
74. Manders EMM, Verbeek FJ, Aten JA (1993) Measurement of co-localization of objects in dual color confocal images. *Journal of Microscopy* 169: 375–382.
